# Supplementary material
Source: PubMed Central journal article supplement (PMC8179725)

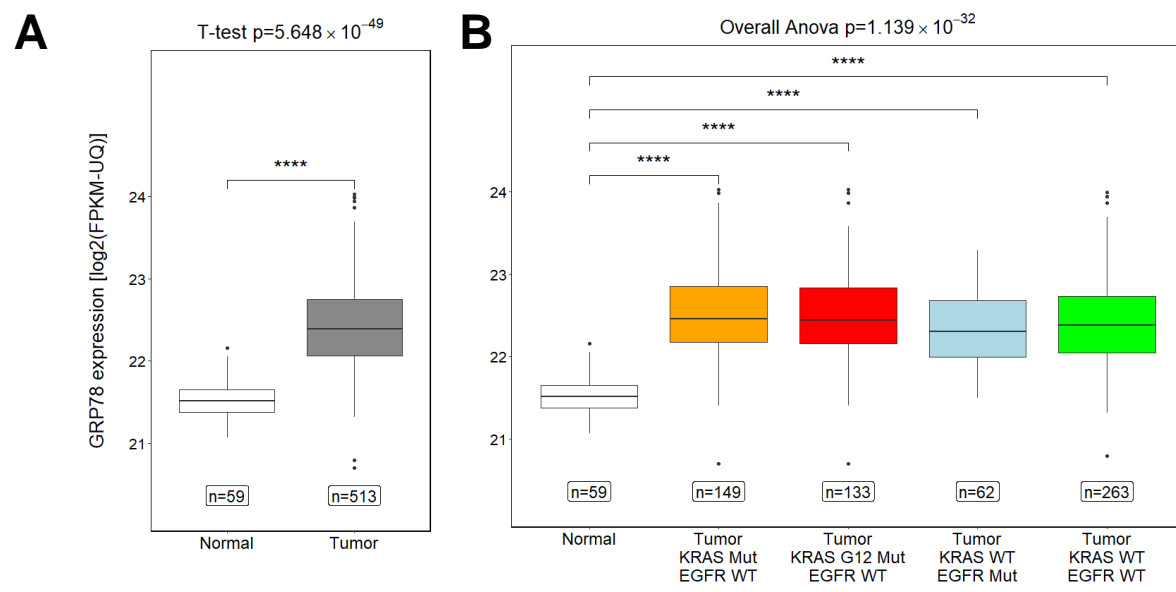

**C**

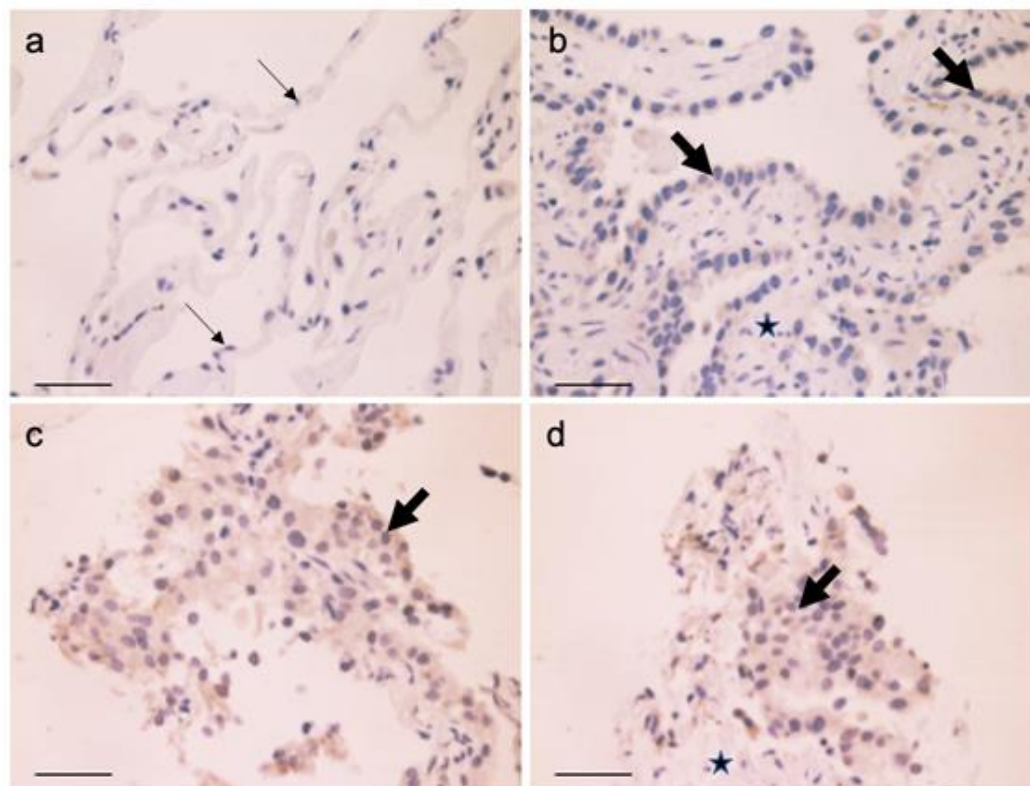

Figure S1

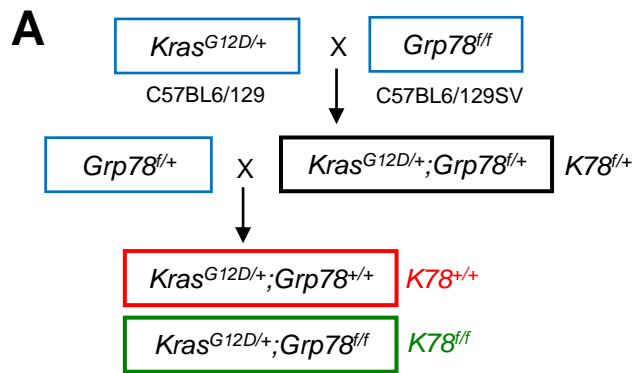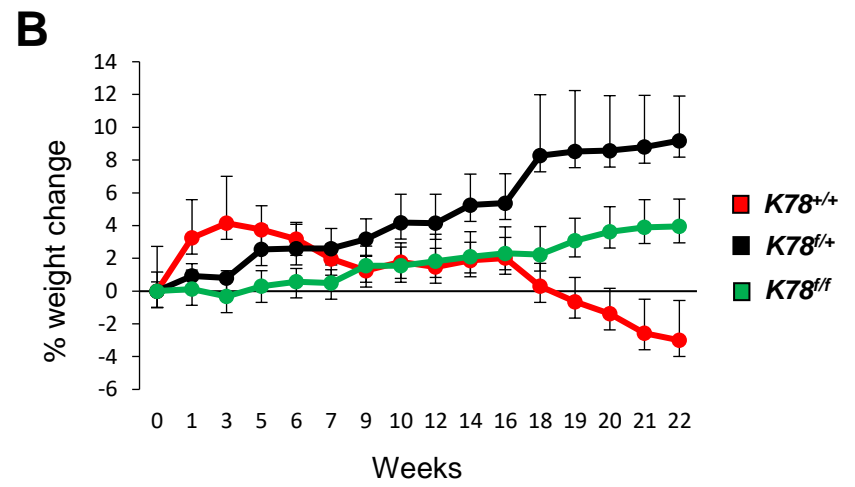

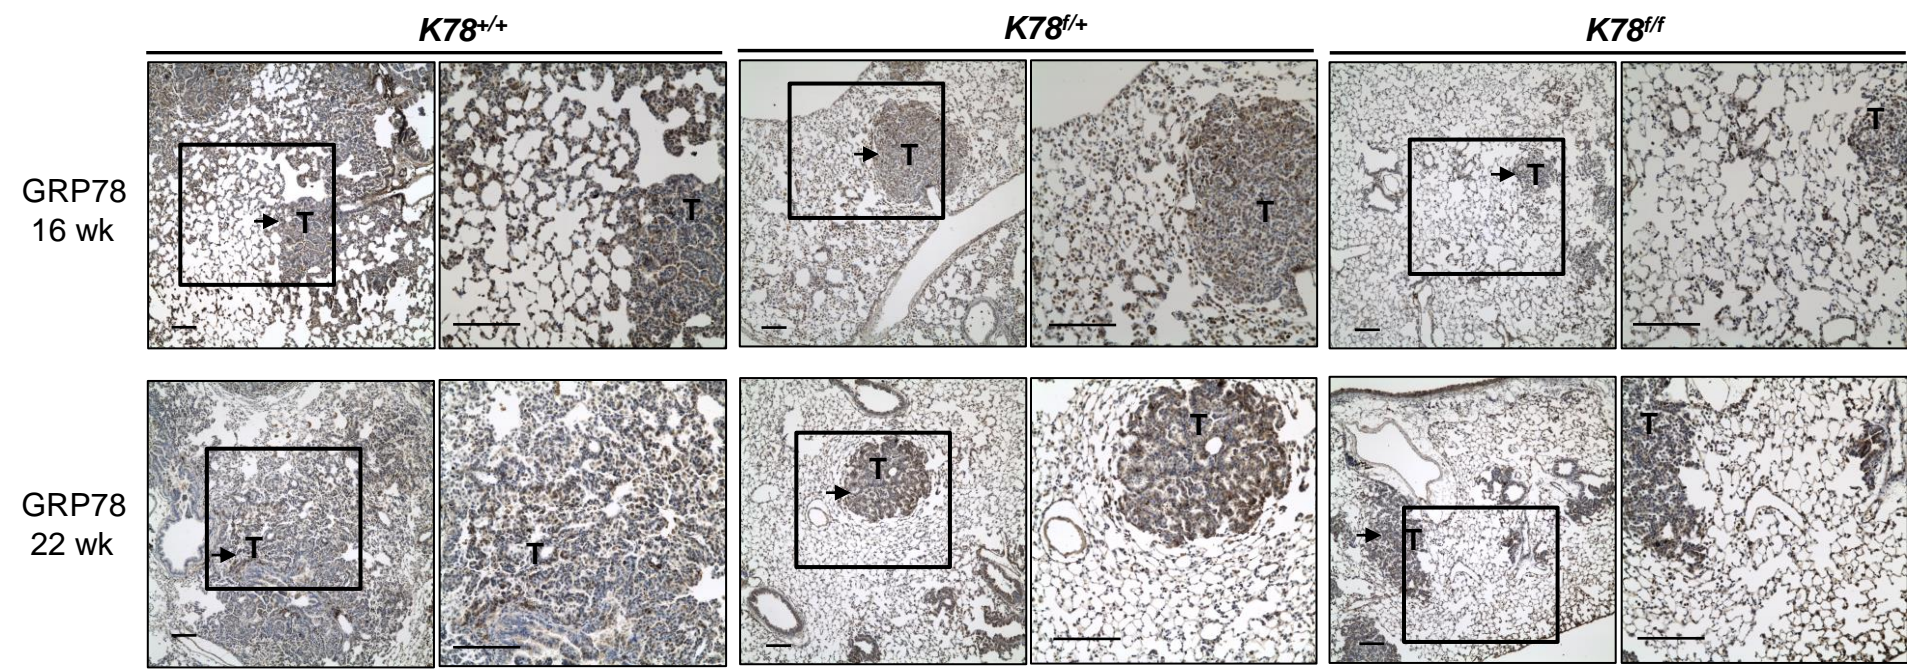

Figure S3

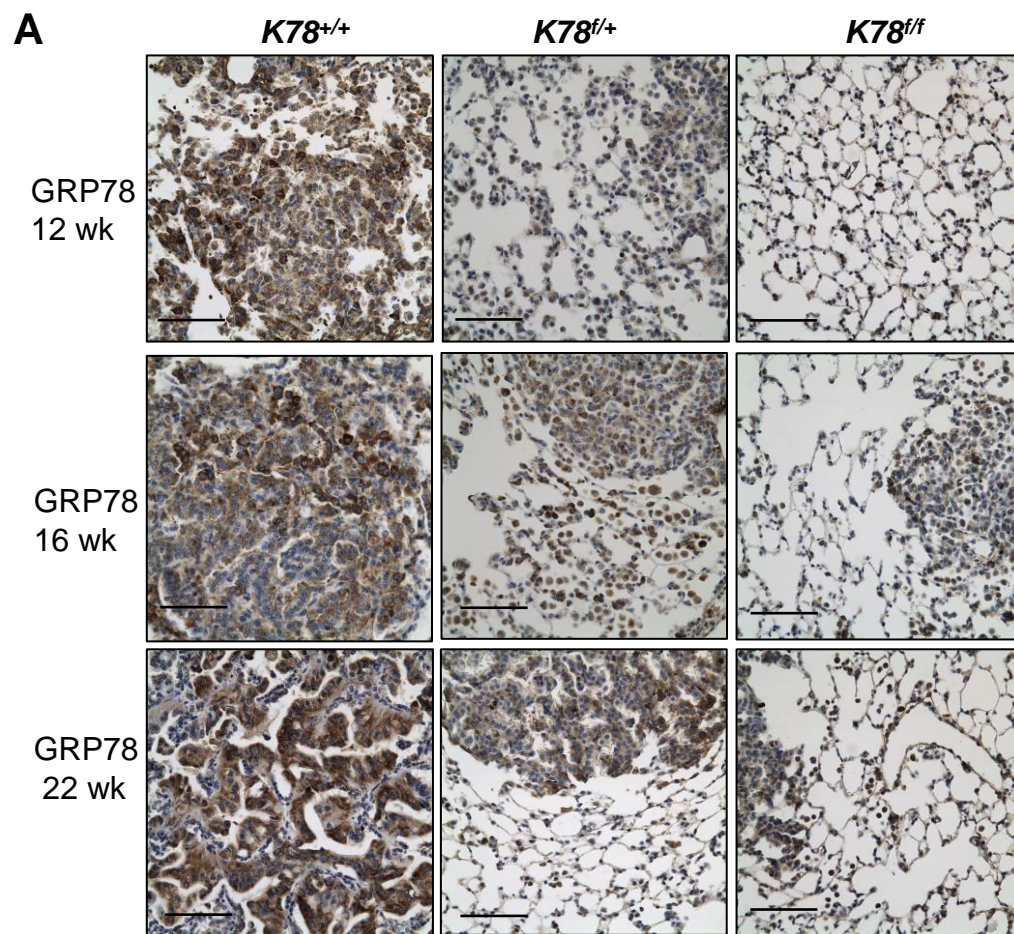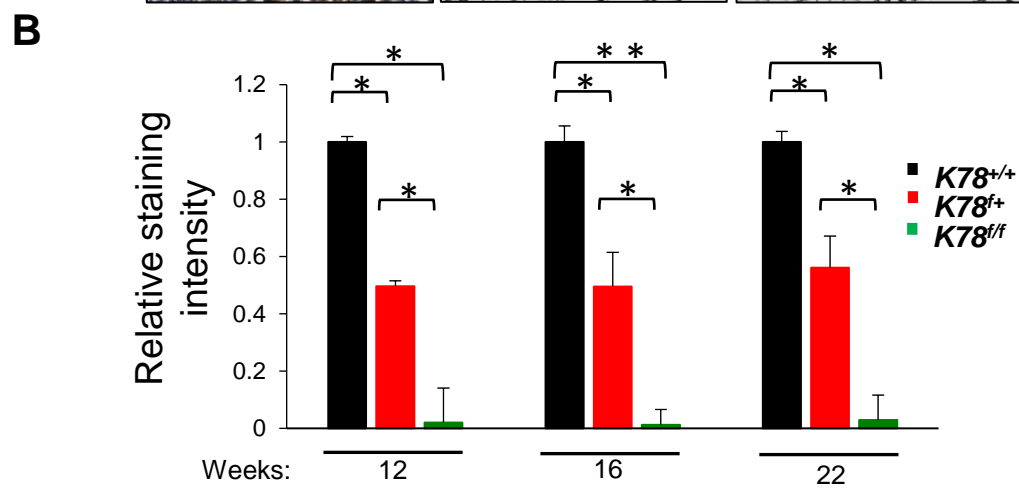

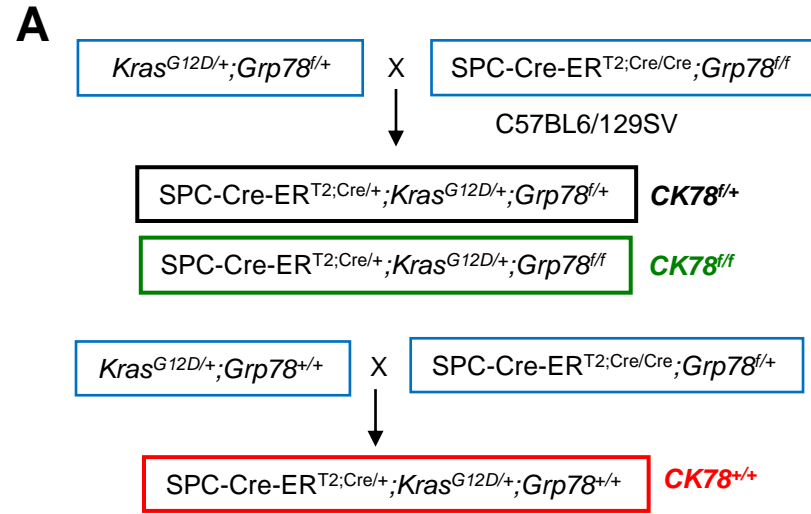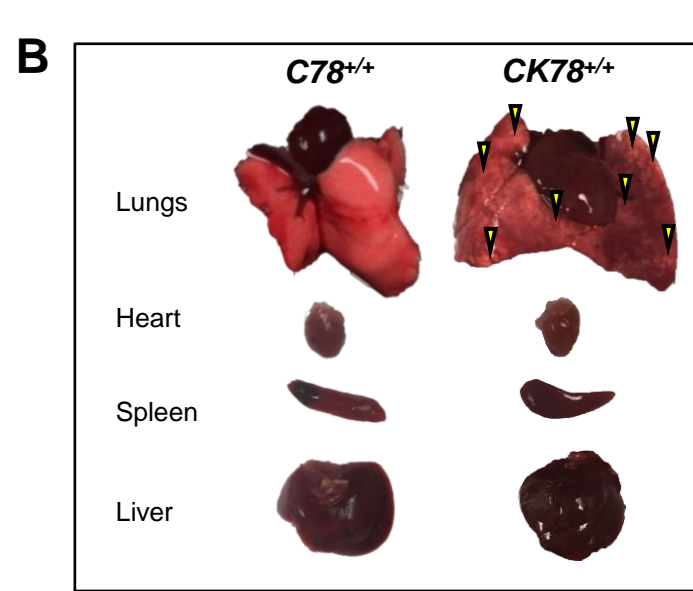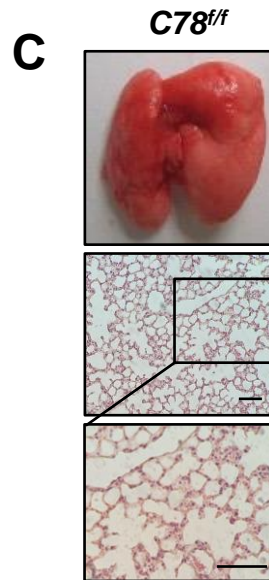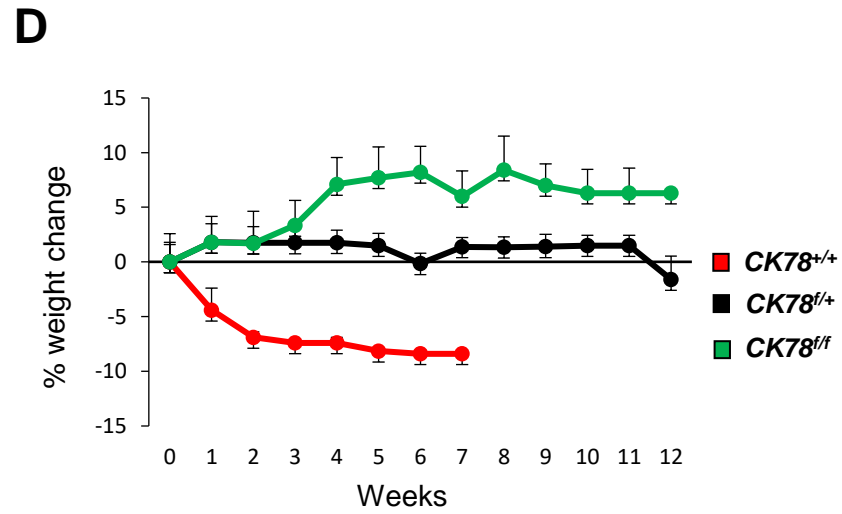

Figure S5

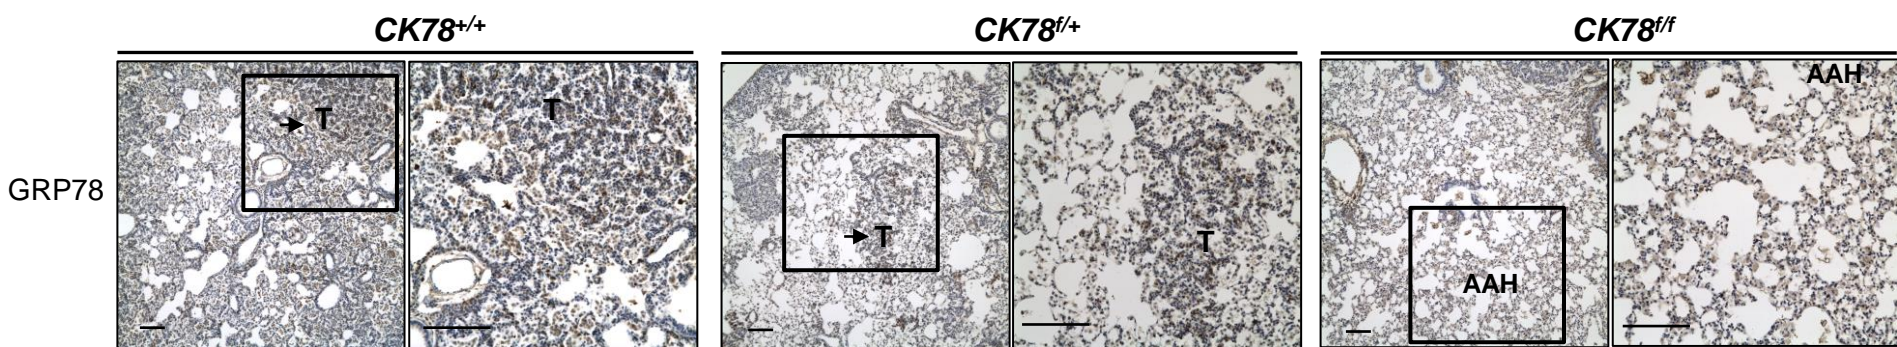

Figure S6

Supplement: NIHMS1701216-supplement-1701216_Supp_Fig1-6.pdf [file NIHMS1701216-supplement-1701216_Supp_Fig1-6.pdf]
